# Supplementary material for: Structures and near-infrared luminescence of unique 4d–4f heterometal–organic frameworks (HMOF)
Source: Royal Society of Chemistry journal article supplement (doi:10.1039/b807491g), 2008-01-01
Supplement: b807491g.pdf [file b807491g.pdf]

## Structure and Near Infrared Luminescence of Unique 4d-4f Heterometal-Organic Frameworks (HMOF)

Bin Zhao, Xiao-Qing Zhao, Zhi Chen, Wei Shi, Peng Cheng,\* Shi-Ping Yan,  
Dai-Zheng Liao

Department of Chemistry, Nankai University, Tianjin 300071, P. R. China.

E-mail: [pcheng@nankai.edu.cn](mailto:pcheng@nankai.edu.cn)

**Crystallographic studies:** Diffraction intensity data for single crystals of **1** and **2** were collected at room temperature on a Bruker Smart CCD diffractometer equipped with graphite-monochromated MoK $\alpha$  radiation ( $\lambda = 0.71073 \text{ \AA}$ ). The structures were solved by the direct method and refined by the full-matrix least-squares method on  $F^2$  with anisotropic thermal parameters for all non-hydrogen atoms.<sup>[1,2]</sup> Hydrogen atoms were located geometrically and refined isotropically. See the CIF file for details.

(1) Sheldrick, G. M. *SHELXS 97, Program for the Solution of Crystal Structures*; University of Göttingen: Germany, 1997.

(2) Sheldrick, G. M. *SHELXL 97, Program for the Refinement of Crystal Structures*; University of Göttingen: Germany, 1997.

**Physical measurements:** Analyses for C, H and N were carried out on a Perkin-Elmer analyzer. The thermal gravimetric analysis (under oxygenated atmosphere, heating rate of 10°C/min) for **2** was completed on a Labsys NETZSCH TG 209 Setaram apparatus. Luminescence spectra in the near-infrared (NIR) region of **1** and **2** were recorded by a homemade apparatus based on an Edinburgh CD900 spectrofluorimeter, which uses a Xenon lamp as the excitation source and a liquid nitrogen cooled hyperpure germanium crystal as a detector.

**Detailed report on TGA of 2:** Thermal gravimetric analysis (TGA) was performed on crystalline samples of **2** in the range of 18 to 800°C (SI-5). The TGA results reveal that the weight loss of 1.84% for **2** between 214 and 320°C corresponds to the loss of all coordinated water molecules (calcd. 2.07%).

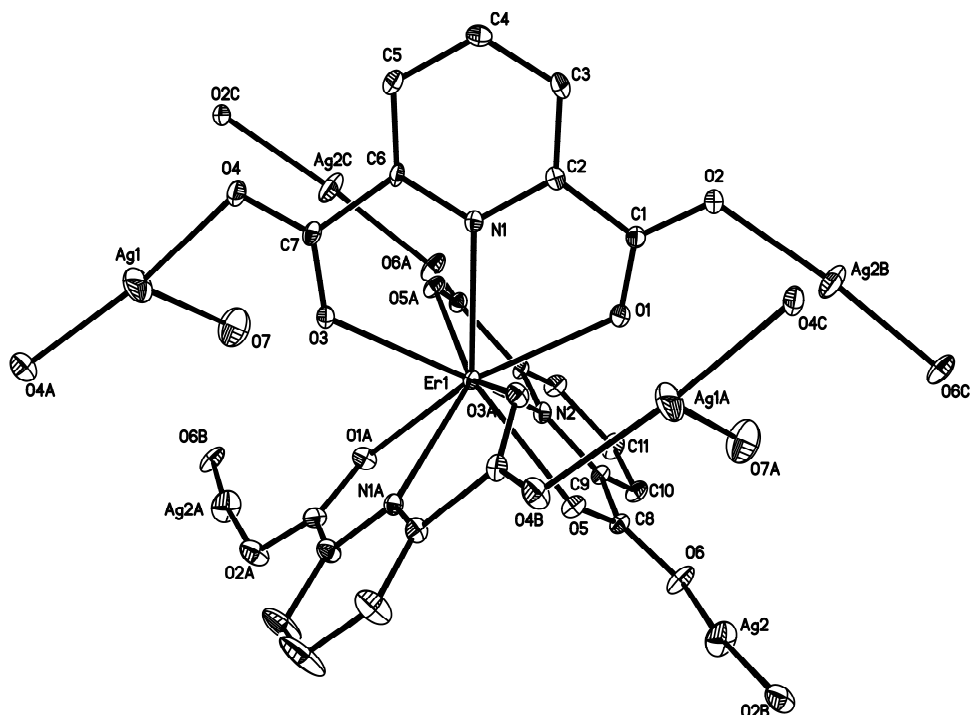

**Figure S1.** The molecular structure of **1**, showing the coordination environments of  $\text{Er}^{3+}$  and  $\text{Ag}^+$  ions. H atoms were omitted for clarity.

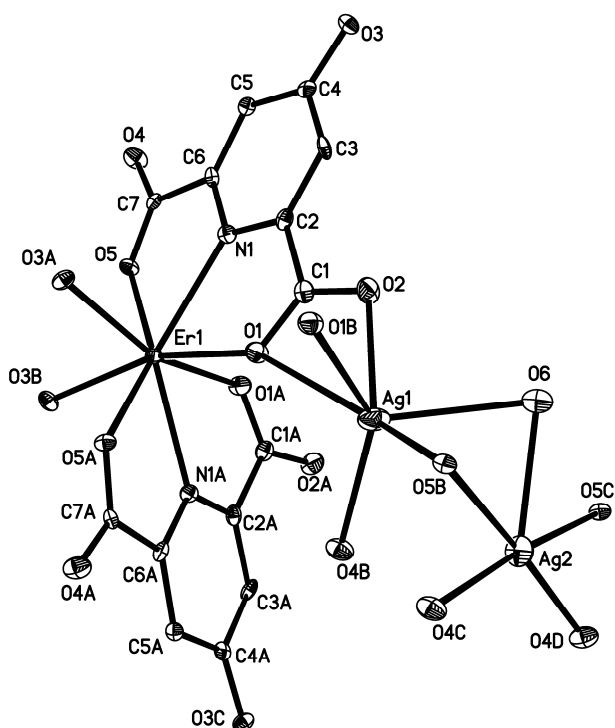

**Figure S2.** The molecular structure of **2**, showing the coordination environments of  $\text{Er}^{3+}$  and  $\text{Ag}^+$  ions. H atoms were omitted for clarity.

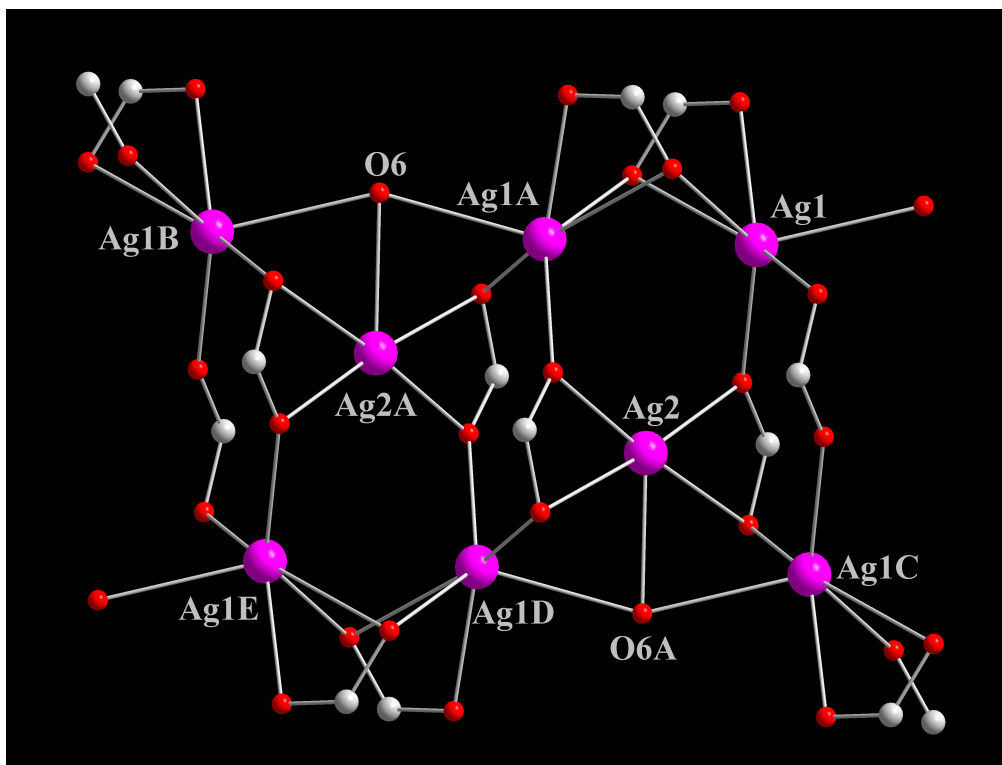

**Figure S3.** In **2**, the structure of the  $\text{Ag}_8$  cluster as a repeat unit in 1D Ag-belt. Color codes: C, gray; Ag, purple; O, red.

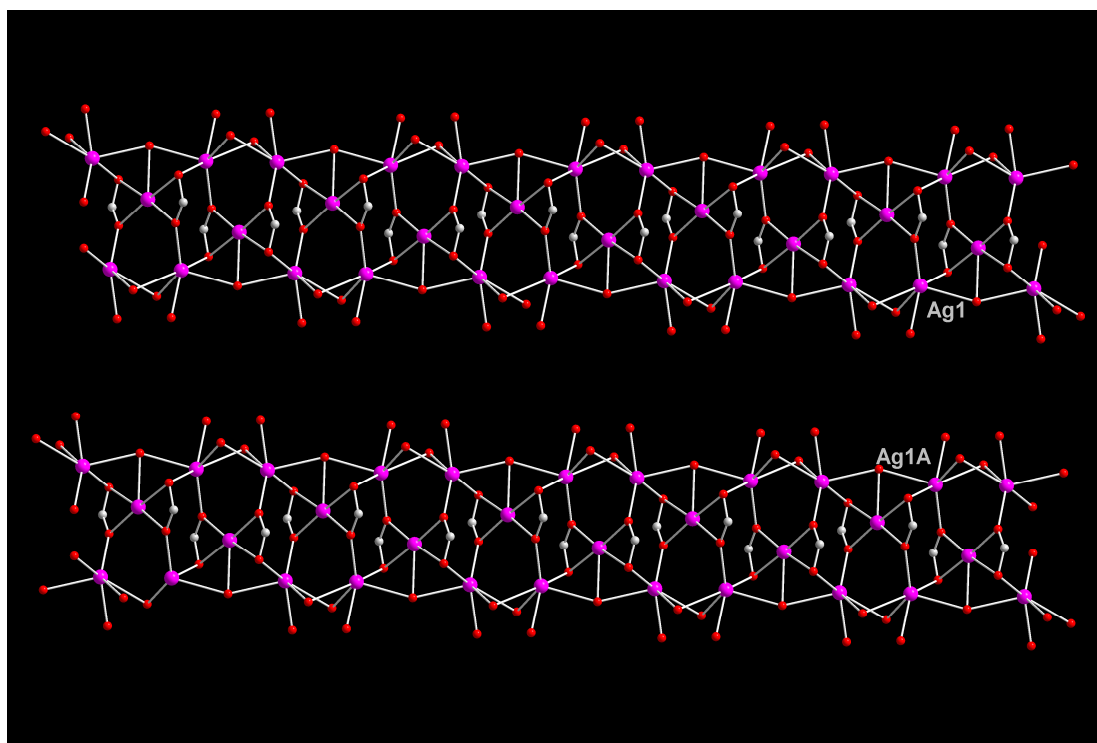

**Figure S4.** The separation between adjacent 1D Ag-belt in *ac* plane with about 8.8 Å (defined by the separation between Ag1 and Ag1A).

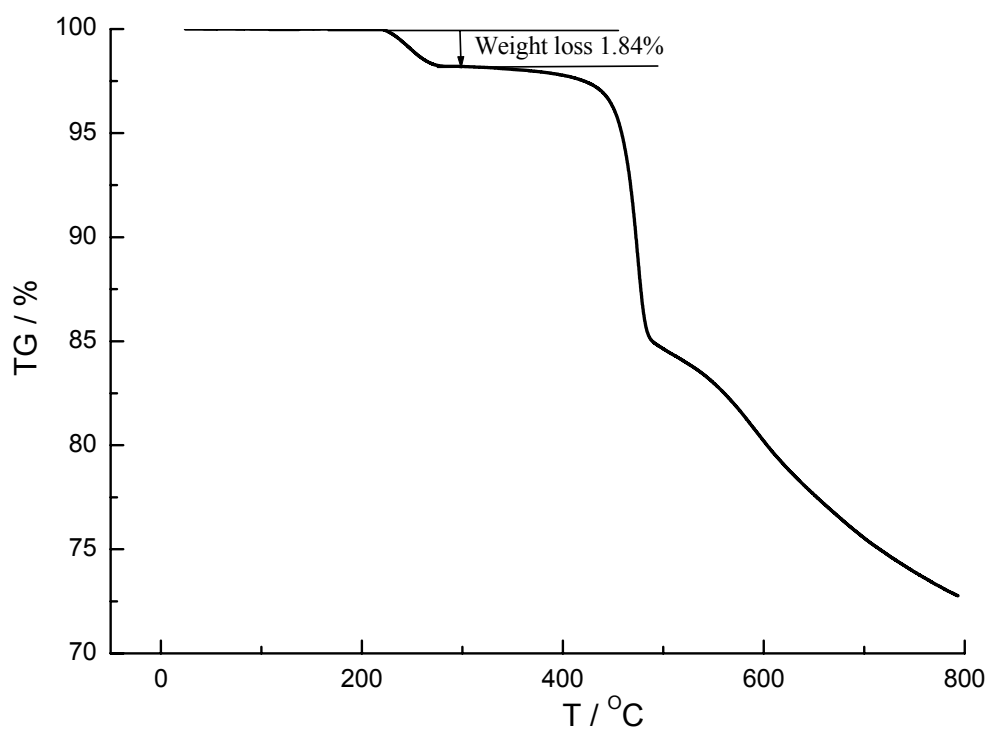

**Figure S5.** TGA curves of **2**.

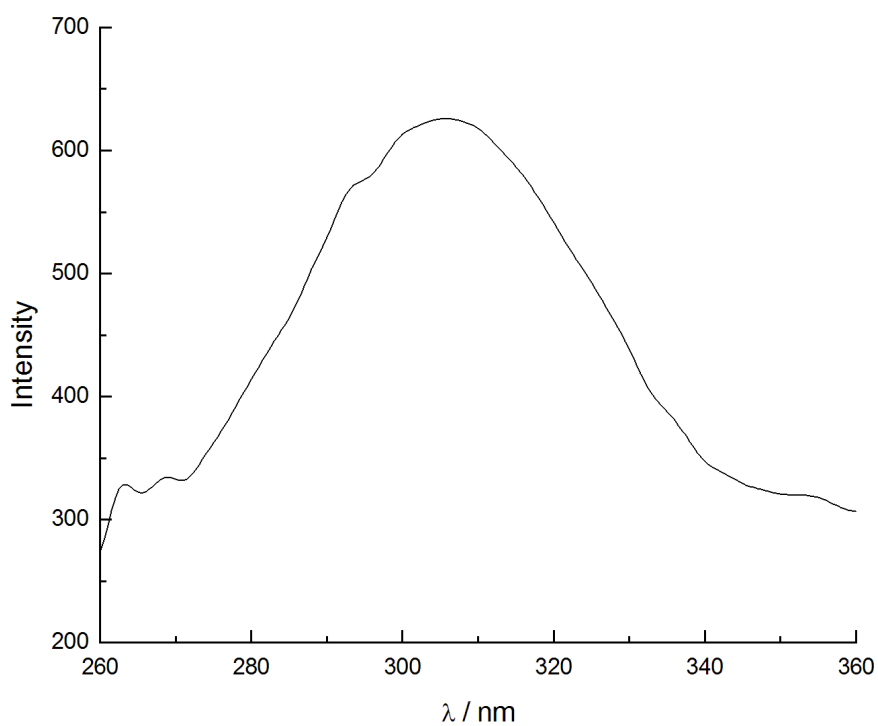

**Figure S6.** The excitation spectrum of **1** (emission at 1540 nm).

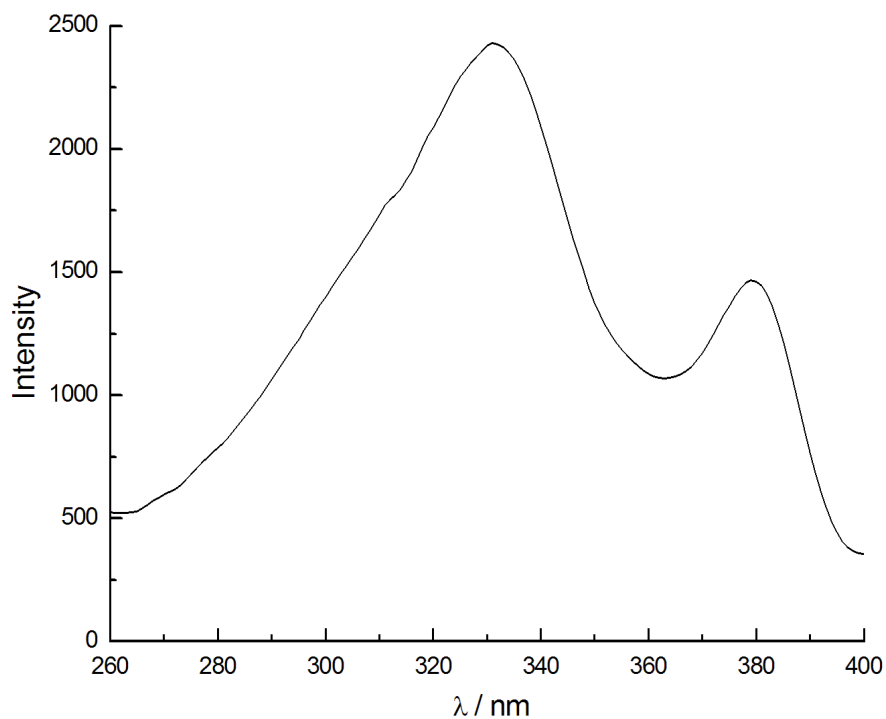

**Figure S7.** The excitation spectrum of **2** (emission at 1540 nm).

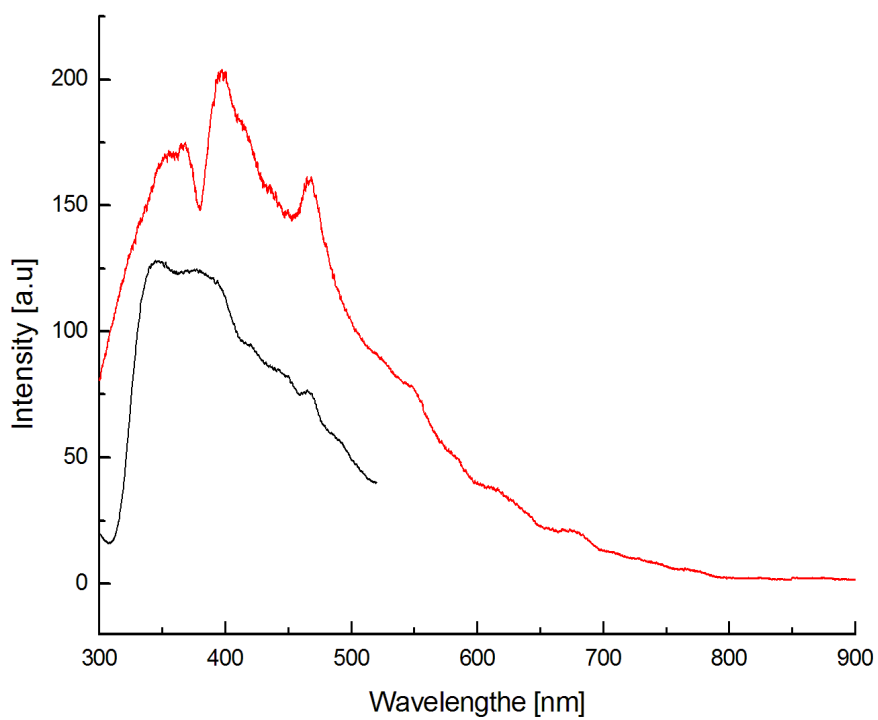

**Figure S8.** The emission spectra of H<sub>2</sub>PDA (black) and **1** (red) (excited at 260 nm).

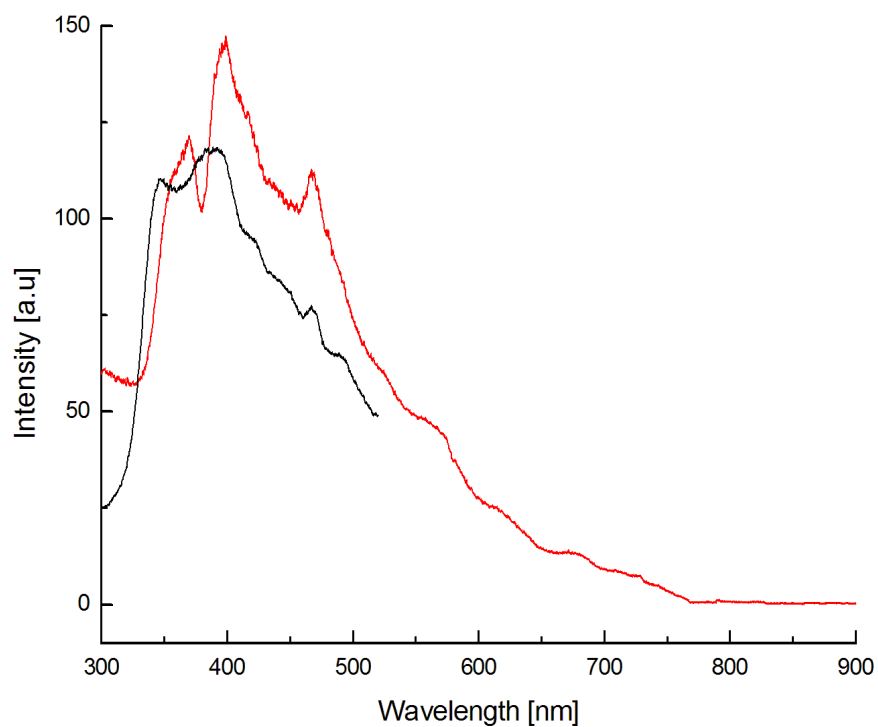

**Figure S9.** The emission spectra of H<sub>3</sub>CAM (black) and 2 (red) (excited at 260 nm).
